# Supplementary material
Source: publisher figshare collection journal article supplement (https://acs.figshare.com/ndownloader/files/5140780)
Supplement: Supplementary file 1 [file 5140780]

## Supporting Information

**Figure S1. LC/MS analysis of 4'-OMe-resveratrol oxidation products.** Extensively dialyzed COX-1 (10  $\mu$ M) was mixed with 20  $\mu$ M FePPIX and 500  $\mu$ M 4'-OMe-resveratrol (**2**) in 100 mM Tris-HCl (pH 8.0). The 500  $\mu$ L reactions were initiated with 1 mM H<sub>2</sub>O<sub>2</sub> and incubated for 10 min at 25°C. The samples were immediately frozen on dry ice and stored at -80°C prior to LC/MS analysis. Aliquots (30  $\mu$ L containing 21.6  $\mu$ g of COX-1 and 15 nmoles of 4'-OMe-resveratrol) were injected onto a Phenomenex Spherisorb C<sub>18</sub> column (5  $\mu$ m; 4.6 x 250 mm) and analyzed in system 2 with in-line MS analysis. (A) TIC chromatogram ( $m/z$  100-800). (B) TIC for MS<sup>2</sup> analysis of  $m/z$  481. (C) MS<sup>2</sup> spectrum of 4'-OMe-resveratrol dimer.

**Figure S2. LC/MS analysis of 3,5-di-OMe-resveratrol oxidation products.** Extensively dialyzed COX-1 (10  $\mu$ M) was mixed with 20  $\mu$ M FePPIX and 500  $\mu$ M 3,5-di-OMe-resveratrol (**3**) in 100 mM Tris-HCl (pH 8.0). The 500  $\mu$ L reactions were initiated with 1 mM H<sub>2</sub>O<sub>2</sub> and incubated for 10 min at 25°C. The samples were immediately frozen on dry ice and stored at -80°C prior to LC/MS analysis. Aliquots (30  $\mu$ L containing 21.6  $\mu$ g of COX-1 and 15 nmoles of 3,5-di-OMe-resveratrol) were injected onto a Phenomenex Spherisorb C<sub>18</sub> column (5  $\mu$ m; 4.6 x 250 mm) and analyzed in system 2 with in-line MS analysis. (A) TIC chromatogram ( $m/z$  100-800). (B) TIC for MS<sup>2</sup> analysis of  $m/z$  509. (C) MS<sup>2</sup> spectrum of 3,5-di-OMe-resveratrol dimer.

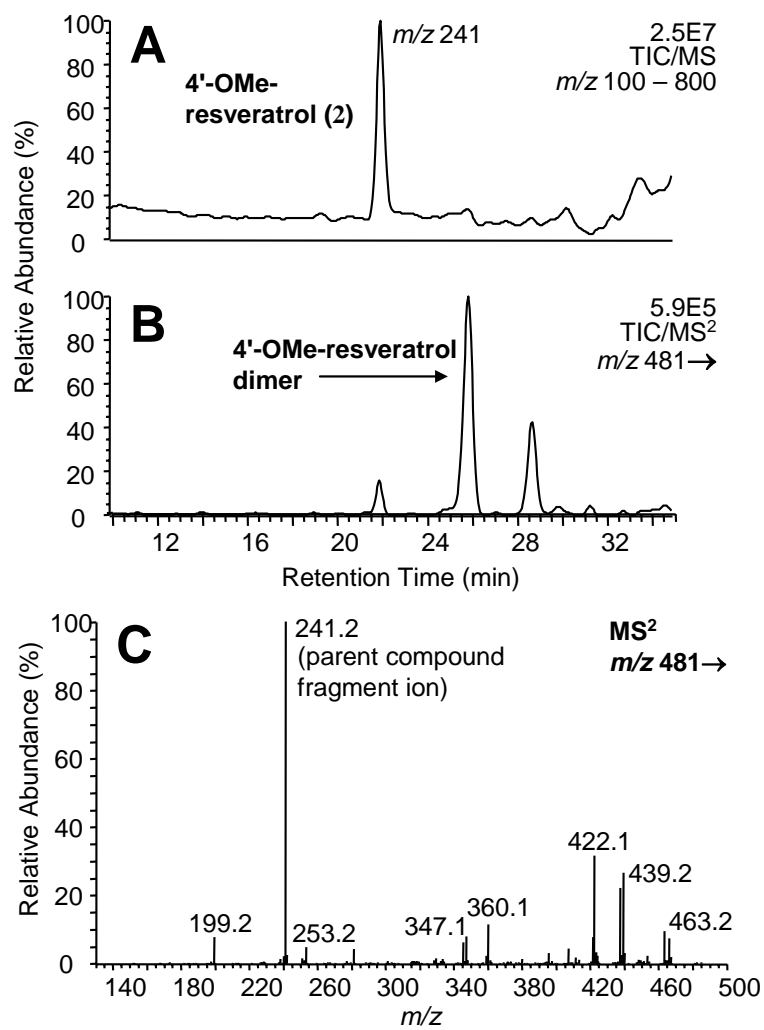

**Figure S1**

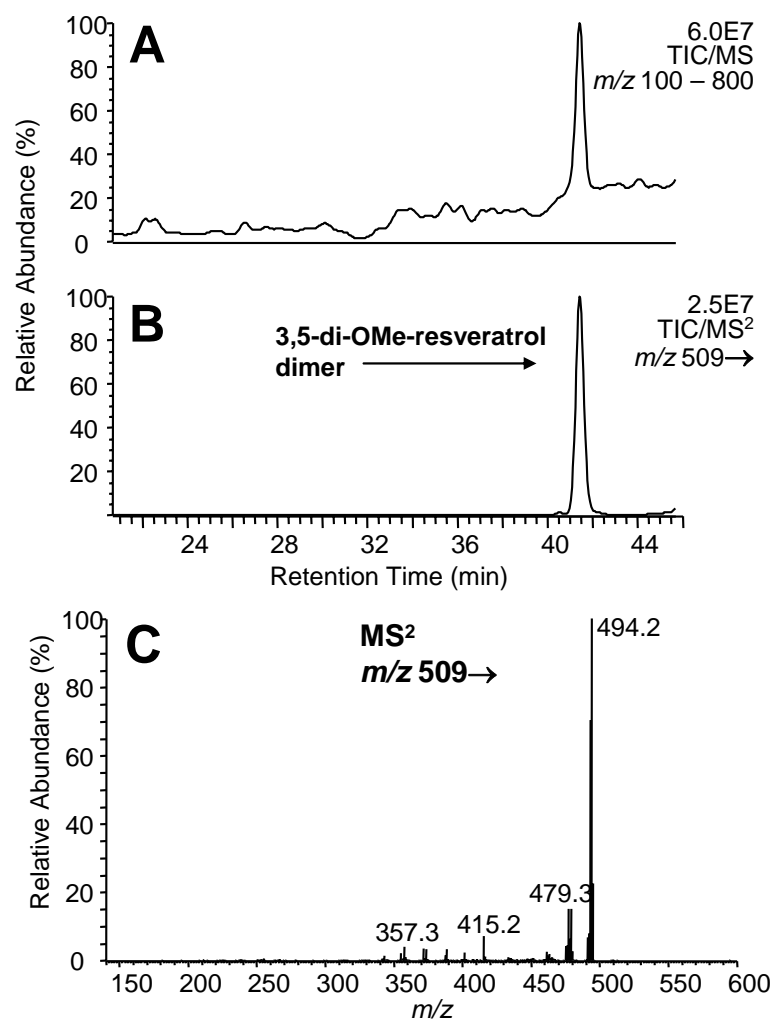

**Figure S2**
